# Supplementary material
Source: PubMed Central journal article supplement (PMC8121514)
Supplement: jci-131-126089-s209.pdf [file jci-131-126089-s209.pdf]

## Supplemental Data

### Myeloid cell-derived PROS1 inhibits tumor metastasis by regulating inflammatory and immune responses via IL-10

Maimon A, Levy-Yahid V, Ben-Meir K, Halpern A, Talmi Z, Priya Z, Mizraji G, Mistriel-Zerbib S, Berger M, Baniyash M, Loges S and Burstyn-Cohen, T.

JCI 2021

## Methods

### Mice

Veterinary care was provided to all animals by the Hebrew University animal care facility staff in accordance with AAALAC standard procedures under specific pathogen-free conditions, and approved by the Hebrew University Ethics committee (approval MD-14025-5). *Pros1*<sup>fl/fl</sup> (1), *LysM-Cre* (2); *CX3CR1*<sup>GFP/WT</sup> (3); and *Ai9*<sup>LSL</sup> (4) mice were previously described. *LysM-Cre*<sup>+</sup>; *Pros1*<sup>fl/fl</sup>; *Ai9*<sup>TdT-LSL/+</sup> experimental mice and *LysM-Cre*<sup>+</sup>; *Pros1*<sup>wt/wt</sup>; *Ai9*<sup>TdT-LSL/+</sup> controls were generated by crossing *LysM-Cre*<sup>+</sup>; *Ai9*<sup>TdT-LSL/TdT-LSL</sup> and *Pros1*<sup>fl/fl</sup> or *Pros1*<sup>+/+</sup>, respectively. Similarly, *LysM-Cre*<sup>+</sup>; *Pros1*<sup>fl/fl</sup>; *CX3CR1*<sup>GFP/WT</sup> and *Pros1*<sup>fl/fl</sup>; *CX3CR1*<sup>GFP/WT</sup> mice were generated by crossing *LysM-Cre*<sup>+</sup>; *Pros1*<sup>fl/fl</sup>; *CX3CR1*<sup>GFP/GFP</sup> and *Pros1*<sup>fl/fl</sup> mice. Primer sequences for genotyping are given in Table 1.

### Cells

Lewis Lung Carcinoma (LLC), LLC-GFP and the mouse mammary AT3-GFP tumor cell lines were previously described (5–8) and kindly provided by Dr. Zvi Granot. Cells were cultured in DMEM containing 10% FBS, 2mM L-Glutamine, 100 Units/ml of penicillin-streptomycin, and maintained in 5% CO<sub>2</sub> humidified incubator at 37°C, and confirmed to be mycoplasma-free. All tissue culture reagents were purchased from Beit Haemek, Israel.

### Experimental tumor models

To evaluate metastatic potency in vivo, LLC cells ( $5 \times 10^5$  in 100µl in sterile PBS Ca<sup>2+</sup>Mg<sup>+</sup>-free) were subcutaneously injected into the rear flank of 6-8 weeks old mice. Primary tumor growth was measured twice weekly using a caliper. Mammary AT3-GFP tumor cells ( $10^6$  cells in 20µl medium containing 25% GFR

matrigel) were orthotopically injected into the two inguinal mammary glands of 6-8 weeks old female mice. 20-24 days post injection, mice were anesthetized, primary tumors and lungs removed for further analysis. For survival and metastatic seeding experiments, LLC-GFP cells ( $2 \times 10^5$  cells in 100 $\mu$ l of sterile PBS) were intravenously injected into the tail vein. Twenty days later mice were anesthetized and transcidentally perfused with PBS/heparin solution after which the lungs were removed, documented and analyzed.

### **Cancer cell education**

$0.25 \times 10^6$  cancer cells were seeded in 6-well plates. The next day, cells were washed in PBS and incubated (24hrs for LLC; 96hrs for AT-3) in the presence of the designated BMDM-CM, filtered and prepared as described under BMDM and BMDC differentiation. For blocking experiments, 5 $\mu$ g/ml of IgG1 isotype (control) or anti IL-10 antibodies (MAB005 and MAB417 respectively, R&D Systems) was added 45 minutes prior to incubation with cells. Following education, the cells were washed in PBS, trypsinized, and subject to different assays, as described.

### **Analysis of Lung Metastasis**

Mice were perfused with PBS/heparin for analysis of fluorescently-labeled metastasis, or further perfused with 4% paraformaldehyde and processed for Paraffin embedding. 8mM-thick sections were prepared according to standard procedures, stained with Hematoxylin and Eosin (H&E) (Sigma) and documented with an Olympus BX51 microscope equipped with a DP72 digital camera. To quantify lung metastatic efficiency and burden, 3-4 serial H&E stained lung sections were collected every 400 microns, spanning a total of 1200-1500 microns of lung tissue. Quantification was performed as in (9) using Olympus CellSens - XV Image processing software. The software calculated area (in microns squared) after marking the perimeter of the nodule using the polygonal measuring tool. Mets number represents the total number of metastatic nodules in each section. Fluorescently - labeled metastatic foci were documented under fluorescent illumination using an Olympus SZX10 stereoscope mounted with a DP72 cooled CCD followed by western blot or RT-qPCR analyses.

### **Quantitative real time PCR (q-PCR)**

Total RNA was extracted with Tri reagent (Sigma) from cultured cells or from homogenized lung tissue. Mice were intracardially perfused with PBS/heparin, lungs isolated and manually chopped with a sterile blade, homogenized in 900 $\mu$ L TriReagent using 0.9-2mm stainless steel beads (NEXT ADVANCE) and incubated in a homogenizer device (Next Advance) for 5 min at 4°C, maximal speed. 0.5-1  $\mu$ g of RNA was reverse-

transcribed using the QScript cDNA synthesis kit (Quanta). Quantitative RT-qPCR was performed using Perfecta SYBERgreen fast mix (Quanta) on a CFX96 thermocycler (Bio-Rad). A serial dilution of pooled cDNA from all samples was used to generate a linear equation curve with each primer set. Quantification was completed using the Bio-Rad Real-time software, normalizing to GAPDH and using a standard curve-generated formula.

Cq- Threshold cycle from each target gene was inserted into the standard curve formula and the final value was the ratio between the target gene divided by the standard gene. The PCR reaction is composed of 40 cycles. Primers used for RT-qPCR are listed in Table 2.

### **Western blot**

Cells were lysed in Laemmli buffer and analyzed for total protein concentration by standard western blot techniques. Briefly, equal amounts of protein (15 to 30 µg) in Laemmli buffer were subject to PAGE on 8 or 10% gels, transferred to PVDF membranes (Millipore) and blocked with TBST blocking buffer (50 mM Tris-HCl pH 7.5, 0.15 M NaCl and 0.25% Tween-20) containing 5% skim milk (BD-Difco). Membranes were incubated overnight at 4 °C with primary antibodies dissolved in TBST buffer containing 5% BSA and 0.02% sodium azide. Blots were then washed in TBST and incubated for 1 hr at room temperature with secondary HRP-conjugated antibodies, diluted as per manufacturer's instructions in TBST/5% skimmed milk. Blots were washed and developed using the WesternBright ECL kit (Advansta). For quantification of phospho-specific and total band intensities, relevant bands were first normalized to β-actin levels. Primary and secondary antibodies used are listed in Table 3.

### **Immunoprecipitation**

Immunoprecipitation was performed according to (10). Briefly, 3-4 minutes before cell harvesting, 0.12mM sodium vanadate ( $\text{Na}_3\text{VO}_4$ ) diluted in 0.002%  $\text{H}_2\text{O}_2$  was added to the culture to inhibit phosphatase activity. Then, cells were washed with cold PBS ( $\text{Ca}_2^+\text{Mg}_2^+$ -free) and lysed with cold RIPA buffer (5mM β-glycerophosphate, 1% NP-40, 0.5% Sodium-deoxycholate, 0.1% SDS, 0.5mM EDTA in PBS) containing 1:100 protease and phosphatase cocktail inhibitors (P8340 and P5726 respectively, Sigma), and centrifuged (12,000g for 15 min at 4°C) or passed through a 0.45-mm filter. 500µg cell lysate was precleared with 30µl (packed volume) of protein G agarose beads (sc-2002, Santa Cruz) for 2hr, with continuous shaking at 4°C. Tubes were centrifuged (1000rpm/2mins) and the precleared supernatant was incubated with 1µg of phosphotyrosine antibody (05-321; clone 4G10, Millipore) overnight under the same conditions. The next day, 30µl

(packed volume) of protein G-agarose beads were added for another 2hr and immune-precipitates were washed 3X with IP washing buffer (150mM NaCl, 50mM Tris-HCl, 0.05% NP-40, 0.5mM EDTA, 0.1% SDS, pH 7.5). Immuno-precipitates were eluted in 2X Laemmli buffer, heated and analyzed by western blot using a MER-specific antibody (AF591, R&D).

### **Anchorage independent growth**

Colony formation in soft agar was assayed as previously described (11). Briefly,  $15 \times 10^3$  cells were mixed with growth medium and 0.3% agarose and plated over a solidified layer of 1% vol/vol agarose in 2 mL growth medium in a 6 well plate in duplicates. 30 mins later, the agarose was covered with 2mL growth medium as described above. 21 days later, colonies from were counted in ten different fields/well for each experimental condition. Colonies were documented using an Olympus CKX41 (x20 magnitude) mounted with an Olympus DP72 camera, converted to B&W. Colonies with a diameter greater than 25  $\mu$ M were scored manually.

### **Colony Survival**

Cells were seeded sparsely as indicated in the figure, grown for 7-10 days in 2 ml medium//6well plate grown, fixed in 2.5% Glutaraldehyde, rinsed 3-4 times with DDW and stained with 1% methylene blue (Sigma) dissolved in 1M boric acid buffer (pH=8.5). Colonies were documented using the GelDoc imaging system (Bio-Rad) with visible light and counted manually.

### **Invasion assay**

Matrigel invasion assay was performed using 8  $\mu$ m cell culture inserts (Millicell, #MCEP24H48) in 24 well plates coated with 100  $\mu$ l containing 300  $\mu$ g matrigel (Basement Membrane Extract, R&D systems; #343300501) diluted in cold serum-free medium. Matrigel was allowed to solidify for 12 hrs at 37°C, after which  $7.5 \times 10^5$  cells were seeded into the upper chamber inserts in 100 $\mu$ l of serum-free medium. 600 $\mu$ l of growth medium (with 10% FBS) was added to the lower chamber. Cells were incubated in a humidified incubator at 37°C for 72hrs. Lower chamber wells with invaded cells were washed with PBS, fixed and stained as described for the colony survival assay. Cells were counted in 7-10 random-chosen fields using an Olympus CKX41 (x20 magnitude) and plotted as the average cell number per field.

### **BMDM and BMDC differentiation**

Generation of BMDMs was performed as previously described (12). Briefly, bone marrow (BM) was flushed out of the femur and tibia of the indicated mice with PBS buffer using a 27G needle and cultured in DMEM/F12 medium supplemented with 10% FBS 2 mM L-Glutamine, 100 Units/ml of penicillin-streptomycin and 5% vol/vol filtered medium conditioned by L-929 cells (13). Fresh medium containing M-CSF (or L-929 medium) was added after 3 days. 5-7 days later, BMDM purity was evaluated by flow cytometry following immunostaining with CD11b, F4/80 and Ly6C. Cultures were >99% CD11b<sup>+</sup>; F4/80<sup>+</sup>; Ly6C<sup>-</sup> indicating a highly pure population of BMDMs. BMDM-conditioned medium used for education was collected after 7-10 days of growth, centrifuged at 1,500 rpm /4°C for 5 minutes to rid of debris, filtered (0.45µm; Millex), aliquoted and frozen at -80°C until used. For BMDC differentiation, bone marrow cells were cultured in RPMI medium supplemented with 10% FBS 2 mM L-Glutamine, 100 Units/ml of penicillin/streptomycin and 20 ng/ml GM-CSF (Peprotech, USA). Fresh medium containing 20 ng/ml GM-CSF was added after 3 days. BMDCs from the supernatant and loosely attached cells were collected at day 7 and their purity was evaluated by flow cytometry following immunostaining with CD11c (14). BMDC purity reached 86-88% as detected by CD11c<sup>+</sup> immunoreactivity.

### **In vitro stimulation of BMDMs**

Differentiated BMDMs were washed with PBS containing 1mM EDTA and collected using a cell scraper. Cells were centrifuged at 1,100 rpm for 8 minutes and resuspended with DMEM/F12 medium supplemented with 10% FBS, 2 mM L-Glutamine, 100 Units/ml of penicillin-streptomycin, counted and seeded at  $0.5 \times 10^6$  cells in 6-well plates. 12 hrs later, the cells were starved for 4-5 hrs in M-CSF free growth medium containing 0.5% FBS and stimulated with the indicated concentrations of LPS (SIGMA) for the specified times. For rescue experiments, purified hPROS1 (25 nM; Enzyme Research Laboratories, South Bend, IN) was added during macrophage differentiation on days 3 and 5 post seeding of BM cells, the medium collected and prepared as described above on day 7. To examine MERTK activation, BMDMs were starved as described above and stimulated for 15 mins with 25 nM purified hPROS1, followed by immunoprecipitation. UNC4241 (panTAM) or UNC4203 (MERTK specific) were added to the culture for 45 minutes prior to stimulation with PROS1 for 15 minutes, followed by IP as described. To evaluate cytokine secretion by BMDMs following TAM inhibition, BMDMs were starved and treated either with PROS1 alone or with 500 nM of the indicated UNC inhibitors followed by LPS (100 ng/ml) stimulation for 22 hours. Supernatants were analyzed by ELISA. BMDMs at steady state growth (10% FBS) were treated either with PROS1 alone or with of UNC4241 (500 nM) for 24 hours. Following incubation, CM was prepared from the indicated groups and used to educate LLC

cancer cells. For TNF $\alpha$  stimulation experiments, starved BMDMs were treated with recombinant mouse TNF $\alpha$  (PEPROTECH) at the indicated concentrations for 24 hrs. Supernatants were analyzed by ELISA. For blocking experiments, 5 $\mu$ g/ml of Rabbit IgG isotype (control) or anti TNF $\alpha$  antibodies (500-P00 and 500-P64 respectively, PEPROTECH) were added 1hr prior to LPS stimulation.

### **Cytokine expression**

BMDM conditioned medium (100-200  $\mu$ l) or plasma (Peripheral blood collected into heparin-coated tubes, centrifuged at 12,000 rpm/10 mins/4 $^{\circ}$ C) were analyzed for mouse TNF- $\alpha$  and IL-6 by ELISA (ELISAMAX Deluxe Set, BioLegend) and IL-10 (900-TM53 mini TMB ELISA kit, PEPROTECH) according to the manufacturer's instructions. For cytokine expression, whole lungs were excised following perfusion with PBS/heparin, chopped and homogenized using a homogenizer device (Next Advance) equipped with 0.9-2 mm stainless steel beads for 5 min at 4 $^{\circ}$ C in RIPA buffer containing 1:100 protease and phosphatase cocktail inhibitors. Pierce BCA Protein Assay kit (23227, Thermo Scientific) was used for quantification. 0.5mg of lysates were used for ELISA detection.

### **Tissue preparation for FACS analysis**

Single cell suspensions of tumors and lungs were mechanically disrupted using a scalpel blade followed by enzymatic digestion (1mg/ml collagenase A; 15mg/ml Hyaluronidase and 10mg/ml DNase I (all from Sigma-Aldrich) in serum-free DMEM for 1-2 hrs at 37 $^{\circ}$ C using constant gentle agitation produced by an orbital shaker. Enzymatic degradation was stopped by adding ELB solution (1M NH $_4$ Cl $_2$ ; 1M KHCO $_3$ ; 0.5M EDTA) and a final wash with PBS.

### **Flow cytometry**

Prior to antibody staining, cells were filtered through a 70 $\mu$ m cell strainer and suspended in FACS buffer (PBS with 2%FBS and 0.01% sodium azide). Fluorophore-conjugated monoclonal antibodies and their corresponding isotype controls were purchased from BioLegend (used at 1:2000 dilution): Pacific Blue-CD45.2(104), APC-F4/80(BM8), PE-Ly6G(1A8), PE-Cy7 Ly6C(HK1.4), FITC-CD11b(M1/70), FITC-CD3 $\epsilon$ (145-2C11), PERCP-Cy5.5-CD8(53-5.8), PE-CTLA4(UC10-4B9), APC-PD-1(29F.1A12), PE-CD11c(N418), APC/Cy7-MHC-II(M5/114.15.2), FITC-CD86(GL-1), APC-CD40(3/23). CD3 $^+$  cells that were CD8 $-$  are considered CD4 $^+$ . Cells were stained on ice, protected from light for 30 mins, centrifuged (1100

rpm/8 mins), washed with FACS buffer and analyzed using an LSR-II (BD Biosciences) flow cytometer. For TCR $\zeta$ -chain intracellular staining, cells were fixed with 1% paraformaldehyde/PBS for 30 min at 4<sup>0</sup>C, washed and permeabilized with 0.1% Saponin (47036, Sigma) for 10 min at room temperature, then stained for CD45.2, CD3 $\epsilon$  and anti- $\zeta$ -chain (15) in the presence of anti-FcR (CD16/32(93) Biologend) in FACS buffer containing 0.1% saponin for 30 min on ice. Analysis was performed using FlowJo software.

### **Macrophage sorting from lungs**

Lungs from the indicated mice were dissociated into single cell suspension, stained for F4/80 (30 minutes/ice) protected from light, washed with FACS buffer and filtered using a 40 $\mu$ m cell strainer. Cells from 6-8 mice/group were pooled and F4/80<sup>+</sup>/GFP<sup>-</sup> cells were sorted using an Aria II sorter (BD). For RNA isolation, sorted cells were collected into PBS, spun at 1100rpm/8 mins, and the pellets resuspended with Tri reagent. For ex-vivo assays, cells were collected into DMEM/F12 containing 10% FBS, 2mM L-glutamine, 100Units/ml of penicillin-streptomycin.

### **Adoptive transfer of labeled BMDMs**

Eight week old recipient *Pros1<sup>fl/fl</sup>* or *LysM-Cre<sup>+</sup>;Pros1<sup>fl/fl</sup>* (*Pros1*-cKO) mice were lethally  $\gamma$ -irradiated (900) rad. Twenty four hrs later the mice were injected intravenously with 4x10<sup>6</sup> BM cells obtained from *Pros1*-WT and *LysM-Cre;Pros1<sup>fl/fl</sup>* mice bearing the tomato red reporter gene (*Ai9-TdT-LSL*). Donor mice carried the following genotypes: *LysM-Cre<sup>+</sup>; Pros1<sup>+/+</sup>*; *Ai9<sup>TdT-LSL</sup>* and *LysM-Cre<sup>+</sup>; Pros1<sup>fl/fl</sup>; Ai9<sup>TdT-LSL</sup>*. Successful BM reconstitution was verified by flow cytometry for Ly6C<sup>+</sup> and Ly6G<sup>+</sup> positive cells, and quantitative real time PCR for the TdT reporter gene in blood cells.

### **Ex-vivo T-cell suppression assay**

96-well plates were pre-coated with 3 $\mu$ g/ml of anti-CD3 $\epsilon$ , Biologend (145-2C11) and anti-CD28 (Biologend 37.51) diluted in 100 $\mu$ l of 0.1M Borate buffer (pH=8.5) for 24h at 4<sup>0</sup>C. Plates were then blocked (1h at room temperature) with borate buffer containing 1% FBS and washed with PBS 3 times. T cells were isolated magnetically from spleen of *Pros1<sup>fl/fl</sup>; CX3CR1<sup>GFP/WT</sup>* mice (StemCell technologies, Cat#: 19851). Purified T cells (>98%) were evaluated by PE-anti-Thy1.2 (140307, Biologend), and stained with CellTrace Violet (Thermo C34557) according to manufacturers instructions. 2 $\times$ 10<sup>5</sup> labeled T-cells were seeded in RPMI (Gibco) supplemented with 10% FBS, 2mM L-glutamine and 1% pen-strep solution (Biological Industries). Upon

sedimentation of T cells (1 hour at 4<sup>0</sup>C), sorted lung macrophages (F4/80<sup>+</sup>;GFP<sup>-</sup>) from *Pros1<sup>fl/fl</sup>*; CX3CR1<sup>GFP/WT</sup> and LysM-Cre<sup>+</sup>; *Pros1<sup>fl/fl</sup>*; CX3CR1<sup>GFP/WT</sup> tumor bearing mice were seeded with T-cells at 3:1 ratio in the presence of FcR (anti-CD16/32 (93), BioLegend). Co-cultures were treated with 5µg/ml of antibody (IL-10 neutralizing MAB417 or IgG1 isotype MAB005; R&D systems), or with 50nM purified hPROS1. Following 72 hours of incubation (37<sup>0</sup>C, 5% CO<sub>2</sub>), the average number of T-cell divisions (division index-DI) was calculated as previously described (16) by dividing the total divisions to the total number of cells according to the following formula: DI= G1/2×1+G2/4×2+G3/8×3 (total divisions)/G0+G1/2+G2/4+G3/8 (total number of cells). G represents the number of cells in each generation, and G0 represents non dividing cells. All the analysis were performed using FCS-Express V6 proliferation analyzer (DeNovo software). Nitrite secretion in cells supernatant was measured using Griess reagent (abcam 234044), according to manufacturers protocol. Results were obtained following subtraction of absorbance in T cell supernatants. NaNO<sub>2</sub> was used as internal standard, absorbance was measured at 540 nm in a TECAN microplate reader.

## Statistics

Experiments were repeated at least 2-3 times unless otherwise mentioned. Analysis was performed by one or two-way ANOVA with multiple comparisons for multiple groups, or Student's t test, unless otherwise stated. P values (P) \* P ≤ 0.05; \*\* P < 0.01 and \*\*\* P < 0.001 were considered significant.

**Table 1 – Primers used for genotyping**

| Gene               | Forward primer                | Reverse primer            |
|--------------------|-------------------------------|---------------------------|
| Cre                | 5'ATTTGCCTGCATTACCGGTC 3'     | 5'ATCAACGTTTTCTTTTCGG 3'  |
| <i>Pros1 flox</i>  | 5'CAATACAAGGCAAAGGGAATGAGG 3' | 5'GAGCTCTCAGAGACTAAAC 3'  |
| Ai9 <sup>LSL</sup> | 5' CCGAAAATCTGTGGGAAGTC 3'    | 5'AAGGGAGCTGCAGTGGAGTA 3' |

**Table 2 – Primers used for RT-qPCR**

| Gene        | Forward primer                     | Reverse primer                  |
|-------------|------------------------------------|---------------------------------|
| <i>Tnfa</i> | 5' ATGAGCACAGAAAGCATGATC 3'        | 5' TACAGGCTTGTCACCTCGA ATT 3'   |
| <i>IL-6</i> | 5' TCTCTGGGAAATCGTGGA 3'           | 5' CCAGTTTGGTAGCATCCATC 3'      |
| <i>NOS2</i> | 5' CCCTTCCGAAGTTTCTGGCAGCAGC<br>3' | 5' GGCTGTCAGAGCCTCGTGGCTTTGG 3' |



|                 |                                |                                  |
|-----------------|--------------------------------|----------------------------------|
| <i>IL-12p35</i> | 5' ACGAGAGTTGCCTGGCTACTAG 3'   | 5' CAGGTCTTCAATGTGCTGG 3'        |
| <i>Socs3</i>    | 5' TCCCATGCCGCTCACAG 3'        | 5' ACAGGACCAGTTCAGGTAATTG 3'     |
| <i>Pros1</i>    | 5' GCACAGTGCCCTTTGCCT 3'       | 5' CAAATACCACAATATCCTGAGACGTT 3' |
| <i>Gas6</i>     | 5' AGGTCTGCCACAACAAACCA 3'     | 5' GCGTAGTCTAATCACGGGGG 3'       |
| <i>Mertk</i>    | 5' AATGCACAATGCCACCTGCACA 3'   | 5' ATCCCGCAACATGCAATTCCGA 3'     |
| <i>Gfp</i>      | 5' ACAACAGACAATCGGCTGCTC 3'    | 5' AGCAAGGTGAGATGACAGGAG 3'      |
| <i>Il-10</i>    | 5' GTGAAGACTTTCTTTCAAACAAAG 3' | 5' CTGCTCCACTGCCTTGCTCTTATT 3'   |
| <i>Gapdh</i>    | 5' TCCCCTCTTCCACCTTCGA 3'      | 5' AGTTGGGATAGGGCCTCTCTT 3'      |
| <i>Luc</i>      | 5' CACCGTCGTA TTCGTGAGCA 3'    | 5' AGTCGTA CTGTTGAAGCCG 3'       |

**Table 3 – Antibodies used for western blot**

| Primary antibody             | Antibody Dilution | Manufacturer   | Cat. number |
|------------------------------|-------------------|----------------|-------------|
| Ms anti pERK                 | 1:10000           | Sigma          | M9692       |
| Rb anti ERK                  | 1:1000            | Cell Signaling | #9102       |
| Rb anti pAKT ser473          | 1:1000            | Cell Signaling | #9271       |
| Rb anti AKT                  | 1:1000            | Cell Signaling | #9272       |
| Rb anti PROS1                | 1:1000            | Millipore      | AB15928     |
| Gt anti MER                  | 1:2000            | R&D Systems    | AF591       |
| Rb anti pNF-kB (p65 ser 536) | 1:1000            | Cell Signaling | #3033       |
| Rb anti NF-kB                | 1:1000            | Cell Signaling | #4764       |
| Gt anti GAPDH                | 1:2000            | Cell Signaling | #2118       |

|                        |        |                |         |
|------------------------|--------|----------------|---------|
| Rb anti $\beta$ -actin | 1:2000 | Cell Signaling | #8457   |
| Rb anti GFP            | 1:2000 | Cell Signaling | #2956   |
| Rb anti MMP9           | 1:1000 | abcam          | ab38898 |
| Rb anti E-cadherin     | 1:1000 | Cell Signaling | #3195   |
| Rb anti N-cadherin     | 1:1000 | Cell Signaling | #13116  |
| Rb anti Vimentin       | 1:1000 | Cell Signaling | #5741   |
| Rb anti pSTAT1         | 1:1000 | Cell Signaling | #9167   |
| Rb anti STAT1          | 1:1000 | Cell Signaling | #9172   |
| Rb anti pSTAT3         | 1:1000 | Cell Signaling | #9145   |
| Rb anti STAT3          | 1:1000 | Cell Signaling | #4904   |

| Secondary antibodies | Antibody Dilution | Manufacturer   | Cat. number |
|----------------------|-------------------|----------------|-------------|
| Dky anti goat        | 1:5000            | Abcam          | ab97120     |
| Dky anti rabbit      | 1:5000            | Abcam          | ab7083      |
| Horse anti mouse     | 1:5000            | Cell Signaling | #7076S      |

### References:

1. Burstyn-Cohen, T., Heeb, M. J., and Lemke, G. (2009) Lack of Protein S in mice causes embryonic lethal coagulopathy and vascular dysgenesis. *J. Clin. Invest.* **119**, 2942–2953
2. Clausen, B. E., Burkhardt, C., Reith, W., Renkawitz, R., and Förster, I. (1999) Conditional gene targeting in macrophages and granulocytes using LysMcre mice. *Transgenic Res.* **8**, 265–277
3. Jung, S., Aliberti, J., Graemmel, P., Sunshine, M. J., Kreutzberg, G. W., Sher, A., and Littman, D. R. (2000) Analysis of Fractalkine Receptor CX3CR1 Function by Targeted Deletion and Green Fluorescent Protein Reporter Gene Insertion. *Mol. Cell. Biol.* **20**, 4106–4114
4. Madisen, L., Zwingman, T. A., Sunkin, S. M., Oh, S. W., Zariwala, H. A., Gu, H., Ng, L. L., Palmiter, R. D., Hawrylycz, M. J., Jones, A. R., Lein, E. S., and Zeng, H. (2010) A robust and high-throughput Cre reporting and characterization system for the whole mouse brain. *Nat. Neurosci.* **13**, 133–140

5. Kim, S., Takahashi, H., Lin, W.-W., Descargues, P., Grivennikov, S., Kim, Y., Luo, J.-L., and Karin, M. (2009) Carcinoma-produced factors activate myeloid cells through TLR2 to stimulate metastasis. *Nature* **457**, 102–106
6. Nowicki, A., Szenajch, J., Ostrowska, G., Wojtowicz, A., Wojtowicz, K., Kruszewski, A. A., Maruszynski, M., Aukerman, S. L., and Wiktor-Jedrzejczak, W. (1996) Impaired tumor growth in colony-stimulating factor 1 (CSF-1)-deficient, macrophage-deficient op/op mouse: Evidence for a role of CSF-1-dependent macrophages in formation of tumor stroma. *Int. J. Cancer* **65**, 112–119
7. Stewart, T. J. and Abrams, S. I. (2007) Altered Immune Function during Long-Term Host-Tumor Interactions Can Be Modulated to Retard Autochthonous Neoplastic Growth. *J. Immunol.* **179**, 2851–2859
8. Mattarollo, S. R., Loi, S., Duret, H., Ma, Y., Zitvogel, L., and Smyth, M. J. (2011) Pivotal role of innate and adaptive immunity in anthracycline chemotherapy of established tumors. *Cancer Res.* **71**, 4809–4820
9. Qian, B. Z., Zhang, H., Li, J., He, T., Yeo, E. J., Soong, D. Y. H., Carragher, N. O., Munro, A., Chang, A., Bresnick, A. R., Lang, R. A., and Pollard, J. W. (2015) FLT1 signaling in metastasis-associated macrophages activates an inflammatory signature that promotes breast cancer metastasis. *J. Exp. Med.* **212**, 1433–1448
10. Zagórska, A., Través, P. G., Lew, E. D., Dransfield, I., and Lemke, G. (2014) Diversification of TAM receptor tyrosine kinase function. *Nat. Immunol.* **15**, 920–928
11. Abboud-Jarrous, G., Priya, S., Maimon, A., Fischman, S., Cohen-Elisha, M., Czerninski, R., and Burstyn-Cohen, T. (2017) Protein S drives oral squamous cell carcinoma tumorigenicity through regulation of AXL. *Oncotarget* **8**, 13986–14002
12. Zhang, X., Goncalves, R., and Mosser, D. M. (2008) The isolation and characterization of murine macrophages. *Curr. Protoc. Immunol.* **Chapter 14**
13. Austin, P. E., McCulloch, E. A., and Till, J. E. (1971) Characterization of the factor in L-cell conditioned medium capable of stimulating colony formation by mouse marrow cells in culture. *J. Cell. Physiol.* **77**, 121–133
14. Carrera-Silva, E. A., Chan, P. Y., Joannas, L., Errasti, A. E., Gagliani, N., Bosurgi, L., Jabbour, M., Perry, A., Smith-Chakmakova, F., Mucida, D., Cheroutre, H., Burstyn-Cohen, T., Leighton, J. A., Lemke, G., Ghosh, S., and Rothlin, C. V. (2013) T Cell-Derived Protein S Engages TAM Receptor Signaling in Dendritic Cells to Control the Magnitude of the Immune Response. *Immunity* **39**, 160–170
15. Rozdzial, M. M., Kubo, R. T., Turner, S. L., and Finkel, T. H. (1994) Developmental regulation of the TCR zeta-chain. Differential expression and tyrosine phosphorylation of the TCR zeta-chain in resting immature and mature T lymphocytes. *J. Immunol.* **153**, 1563 LP – 1580
16. Roederer, M. (2011) Interpretation of cellular proliferation data: Avoid the panglossian. *Cytom. Part A* **79 A**, 95–101

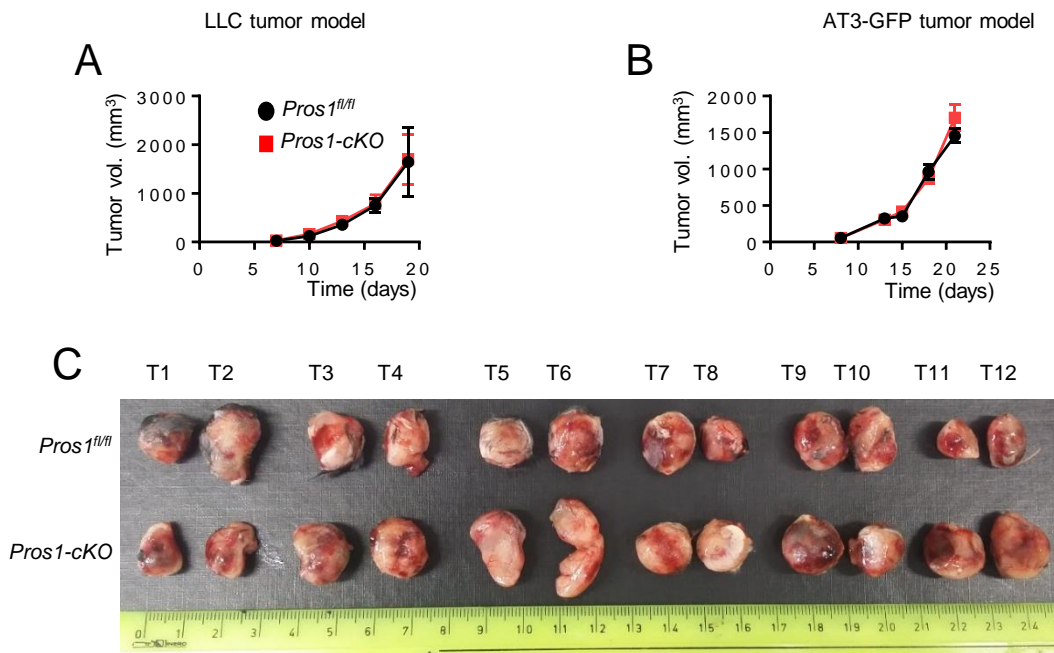

**Supl. Fig.1: Primary tumor growth is not affected by genetic ablation of *Pros1* in host myeloid cells.**

(A) Primary LLC tumor growth was measured at the indicated time points following subcutaneous injection of LLC cells; n=10, 15 mice/genotype. (B) Primary tumor growth dynamics in an orthotopic AT3-GFP mammary cancer model (n=16/group). (A, B) Not significant for all time points, t-test. (C) Representative image of end-point AT3-GFP primary tumors isolated from control (*Pros1<sup>fl/fl</sup>*) and *Pros1-cKO* mice. AT3 cells were injected into the fat pads of two mammary glands/mouse.

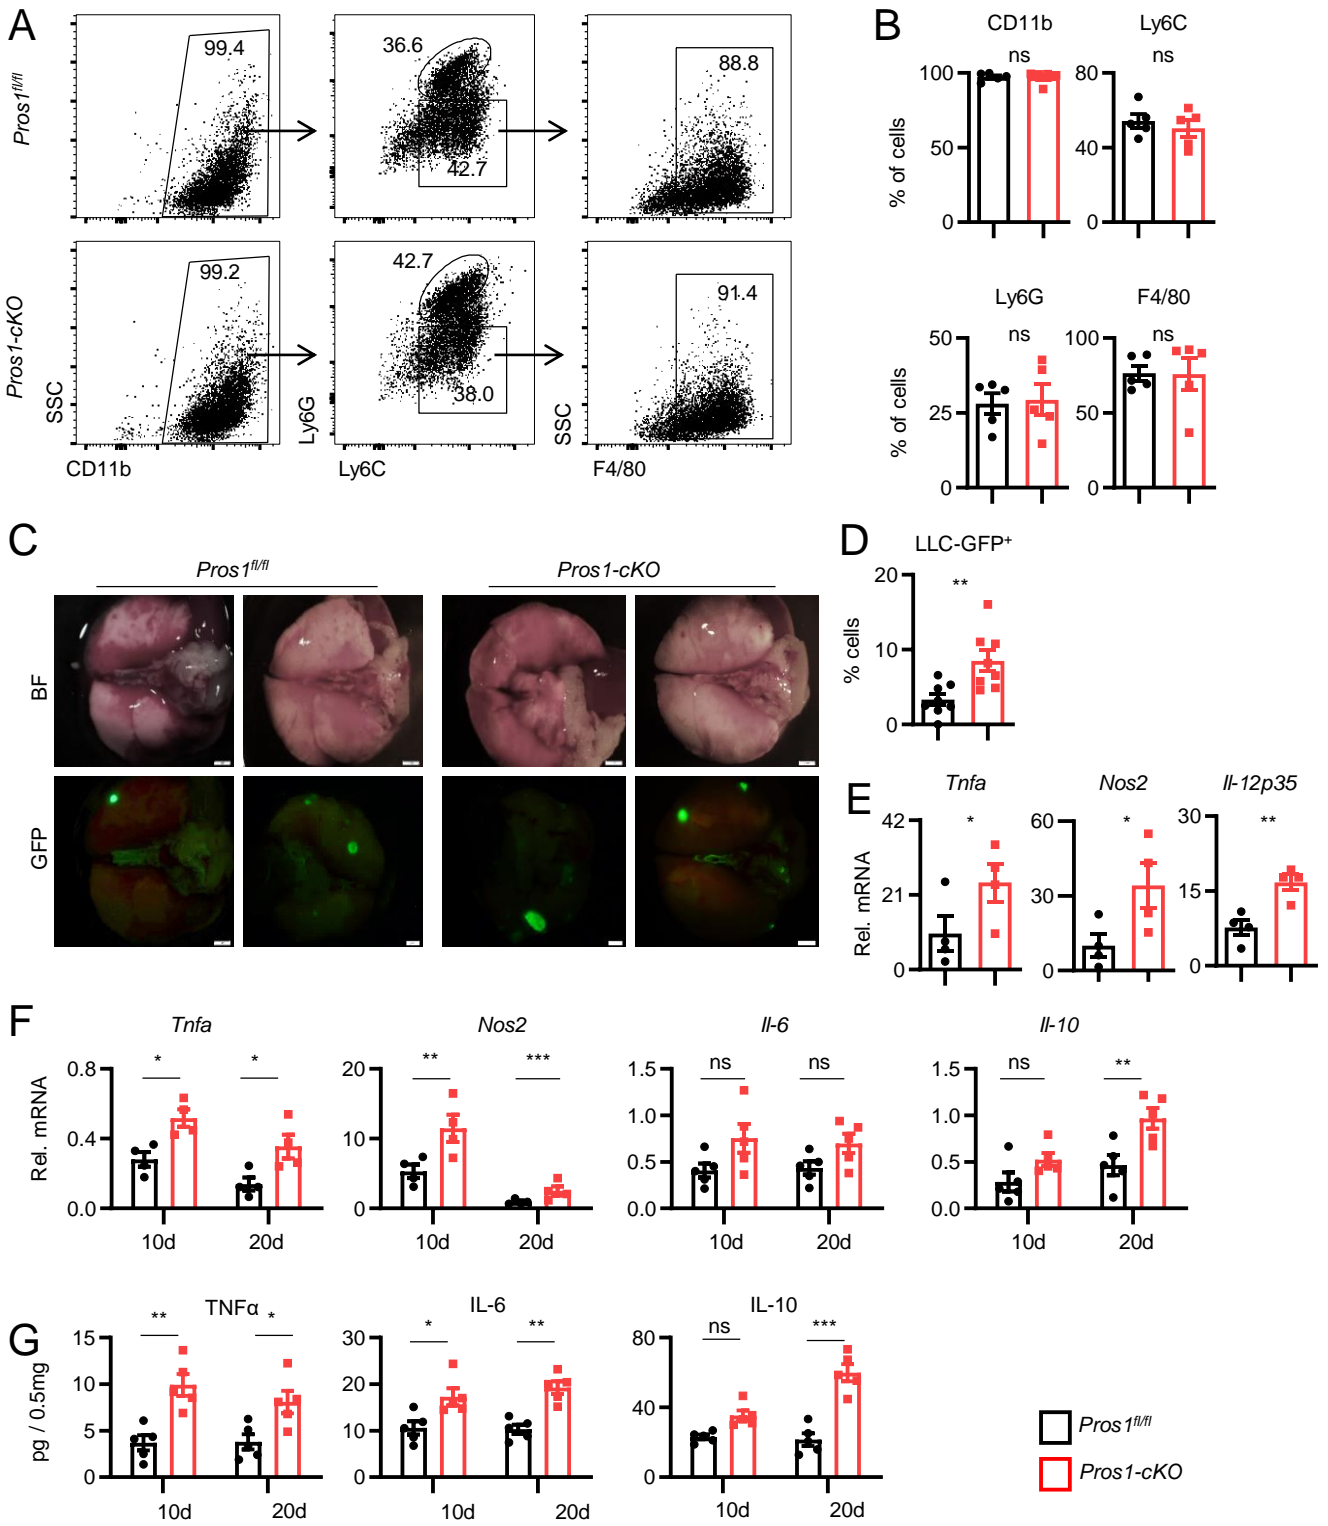

**Supl. Fig.2: Elevated metastatic colonization is independent of the primary tumor.**

(A) Analysis of primary tumors for immune cell infiltrates. Representative FACS plots of CD45<sup>+</sup> gated cells from the indicated mice stained for CD11b<sup>+</sup> (total myeloid cells), Ly6C<sup>+</sup>/ Ly6G<sup>-</sup> (monocytes), Ly6G<sup>+</sup>/ Ly6C<sup>-</sup> (granulocytes) and Ly6G<sup>-</sup>/ F4/80<sup>+</sup> (macrophages). (B) Quantification of FACS plots described in (A). Mean  $\pm$  SEM; n=5 mice/group. ns = non-significant; t-test. (C-E) LLC-GFP cells were injected intravenously (IV) into control and *Pros1*-cKO mice. Twenty-one days later, the lungs were isolated and assessed for metastatic colonization in-situ (C, D) and for cytokines expression (E). Acutely isolated lungs were documented using bright field (C, BF, top) and GFP (C, bottom) illumination. Scale= 1 mm. (D) Metastatic GFP<sup>+</sup> cells from lungs described in C were scored by flow cytometry (n=8/group; P=0.002). (E) Cytokine transcript levels from lungs described in (C) were measured by RT-qPCR. The relative mean  $\pm$  SEM from one of two biological replicates is shown. P=0.04, 0.02, and 0.003 for *Tnfa*, *Nos2* and *Il-12p35*, respectively (t-test). (F-G) Dynamic expression of cytokines within the lungs of control and cKO mice. (F) RT-qPCR measurements of cytokine transcript levels at 10 and 20 days after subcutaneous injection of LLC cells. Mean  $\pm$  SEM ; n=4-5 mice/group. 10 days; P=0.028 and 0.01 for *Tnfa* and *Nos2* respectively. 20 days; P=0.047, 0.0006 and 0.011 for *Tnfa*, *Nos2* and *Il-10* respectively, ns=non-significant; 2-way ANOVA. (G) Cytokine levels measured by ELISA from lungs described in F. Mean  $\pm$  SEM; n=5 mice/group. 10 days; P=0.002, 0.02 and non-significant for TNF $\alpha$ , IL-6 and IL-10 respectively. 20 days; P=0.04, 0.002 and <0.0001 for TNF $\alpha$ , IL-6 and IL-10 respectively, 2-way ANOVA.

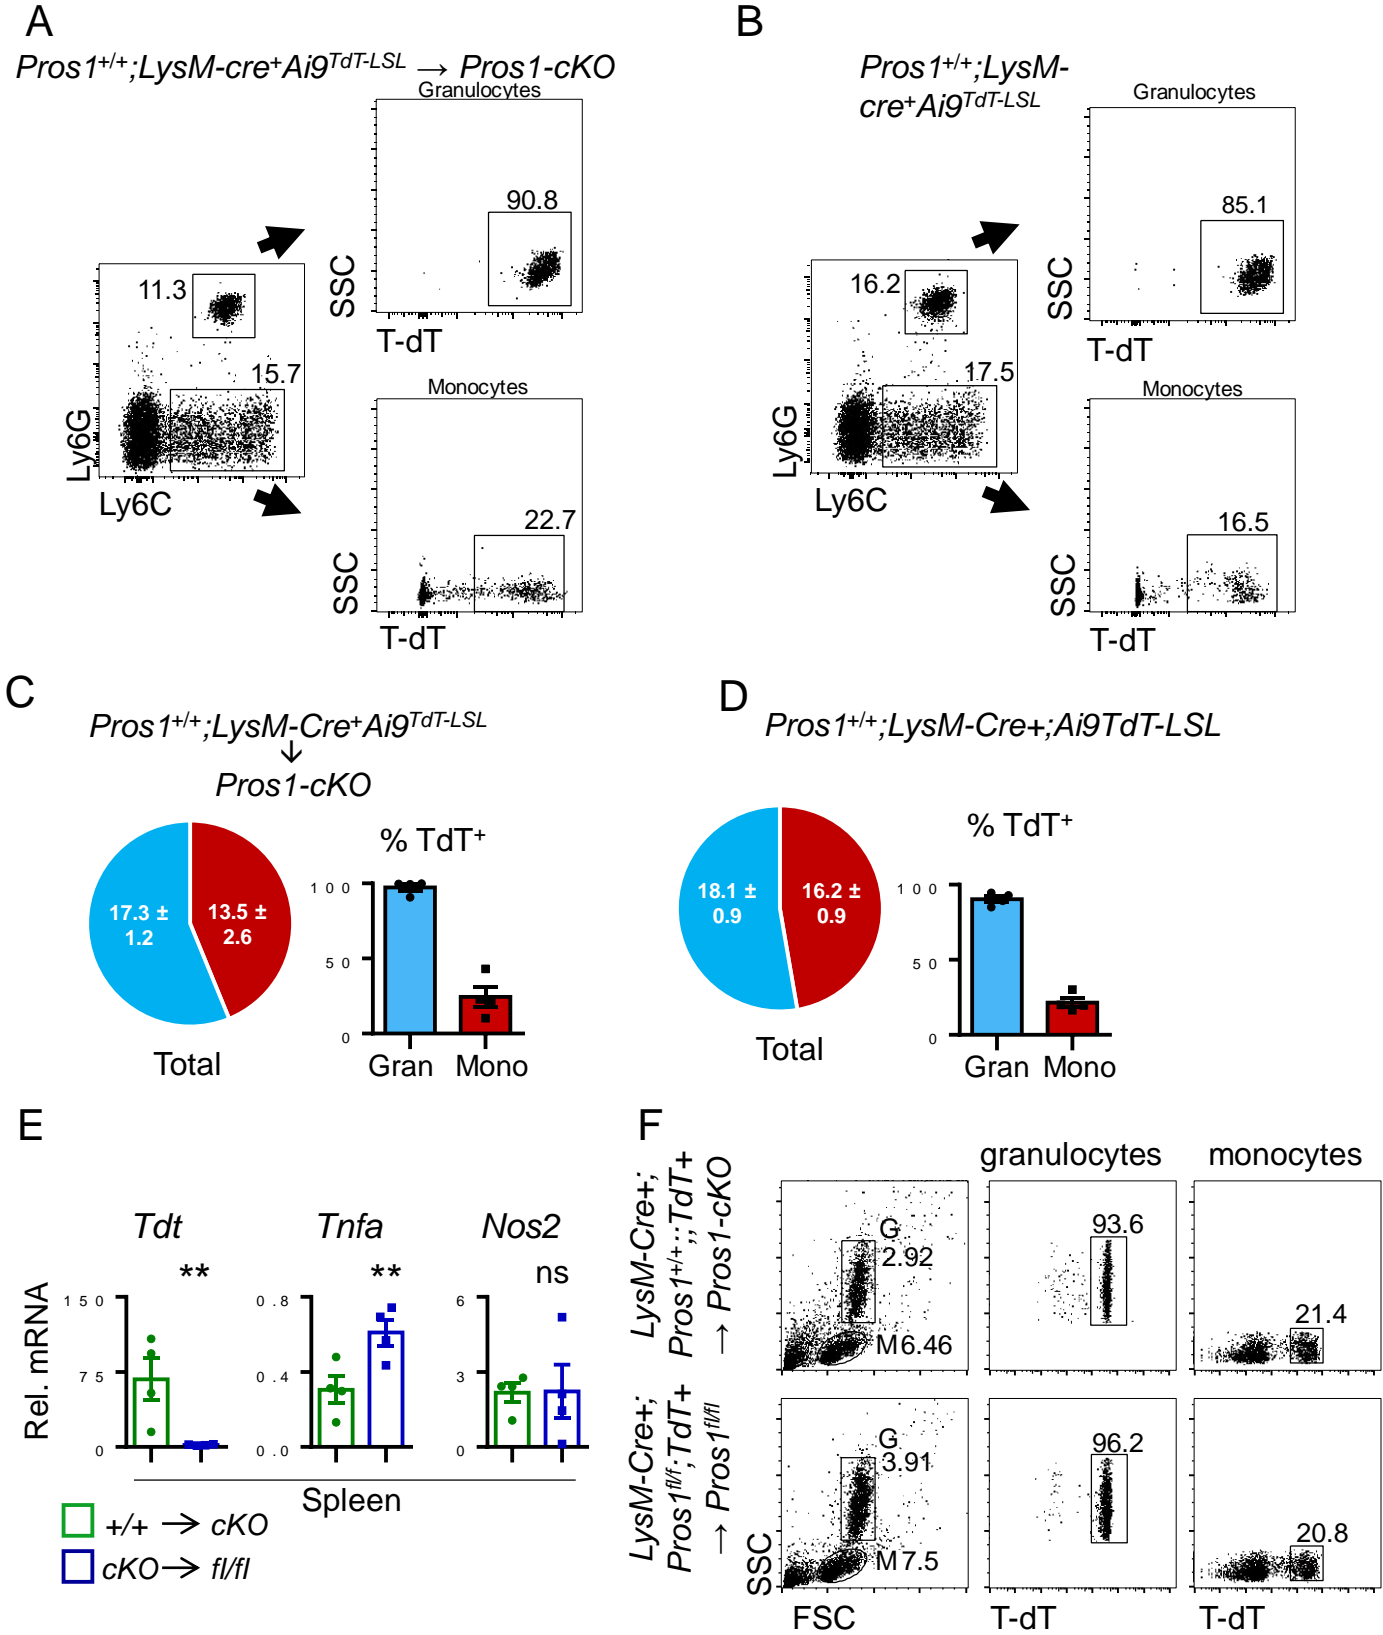

**Suppl. Fig.3: Successful Bone Marrow chimerism in Pros1-cKO mice.**

Representative FACS plots of TdT-positive myeloid cells from the blood of transplanted tumor naïve mice 8 weeks after BM transplantation (A) were found similar to naïve mice expressing TdT in myeloid cells (B) n=4/group. (C-D) The percent of total circulating granulocytes and monocytes (pie chart) and the fraction of TdT-positive cells (bars) from blood of mice described in A and found similar to naïve mice expressing TdT in myeloid cells (D). (E) Detection of TdT and cytokine transcripts by RT-PCR in spleens of transplanted mice following BM transfer from TdT<sup>+</sup> cKO into TdT-deficient *Pros1*<sup>+/+</sup> (cKO<sup>TdT<sup>-/-</sup></sup> → *Pros1*<sup>fl/fl</sup>; blue bars), or the reciprocal group (*Pros1*<sup>+/+</sup>; TdT<sup>+</sup> into cKO, green bars) in tumor-free mice. Mean ± SEM; n=4; t-test. P=0.01 for *TdT* and *Tnfa*. ns = non-significant; t-test. (F) Representative FACS plots of TdT<sup>+</sup> myeloid population and the fraction of monocytes and granulocytes found in the blood of the indicated transplanted mice 3 weeks after LLC-luc inoculation (7 weeks after BM transplantation).



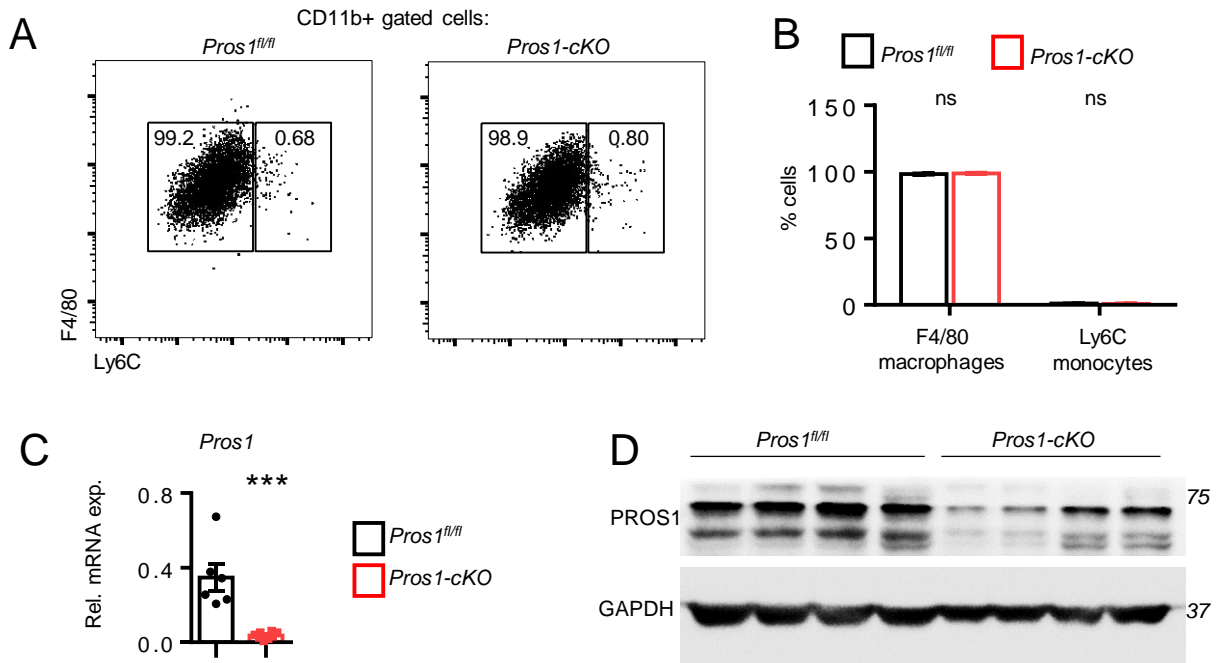

**Supl. Figure 4: Effective LysM-Cre mediated excision of *Pros1* in BMDMs.**

(A) Bone marrow cells were differentiated into BMDMs following stimulation with M-CSF for 7 days. Representative flow-cytometric analysis of CD11b<sup>+</sup> gated cells expressing F4/80 (macrophages) and Ly6C (monocytes), indicating a pure population of macrophages. (B) Average percent  $\pm$  SEM; n=5 mice/group is shown for BMDMs and monocytes. ns=non significant, 2-way ANOVA. (C) Relative *Pros1* mRNA expression in BMDMs described in A. Data represent the mean relative values  $\pm$  SEM; n=6-8 mice/group; P=0.0001; t-test. (D) A representative western blot indicating significantly reduced PROS1 protein levels in BMDMs generated from *Pros1-cKO* mice. Each lane represents BMDMs generated from an individual mouse. GAPDH was used as loading control.

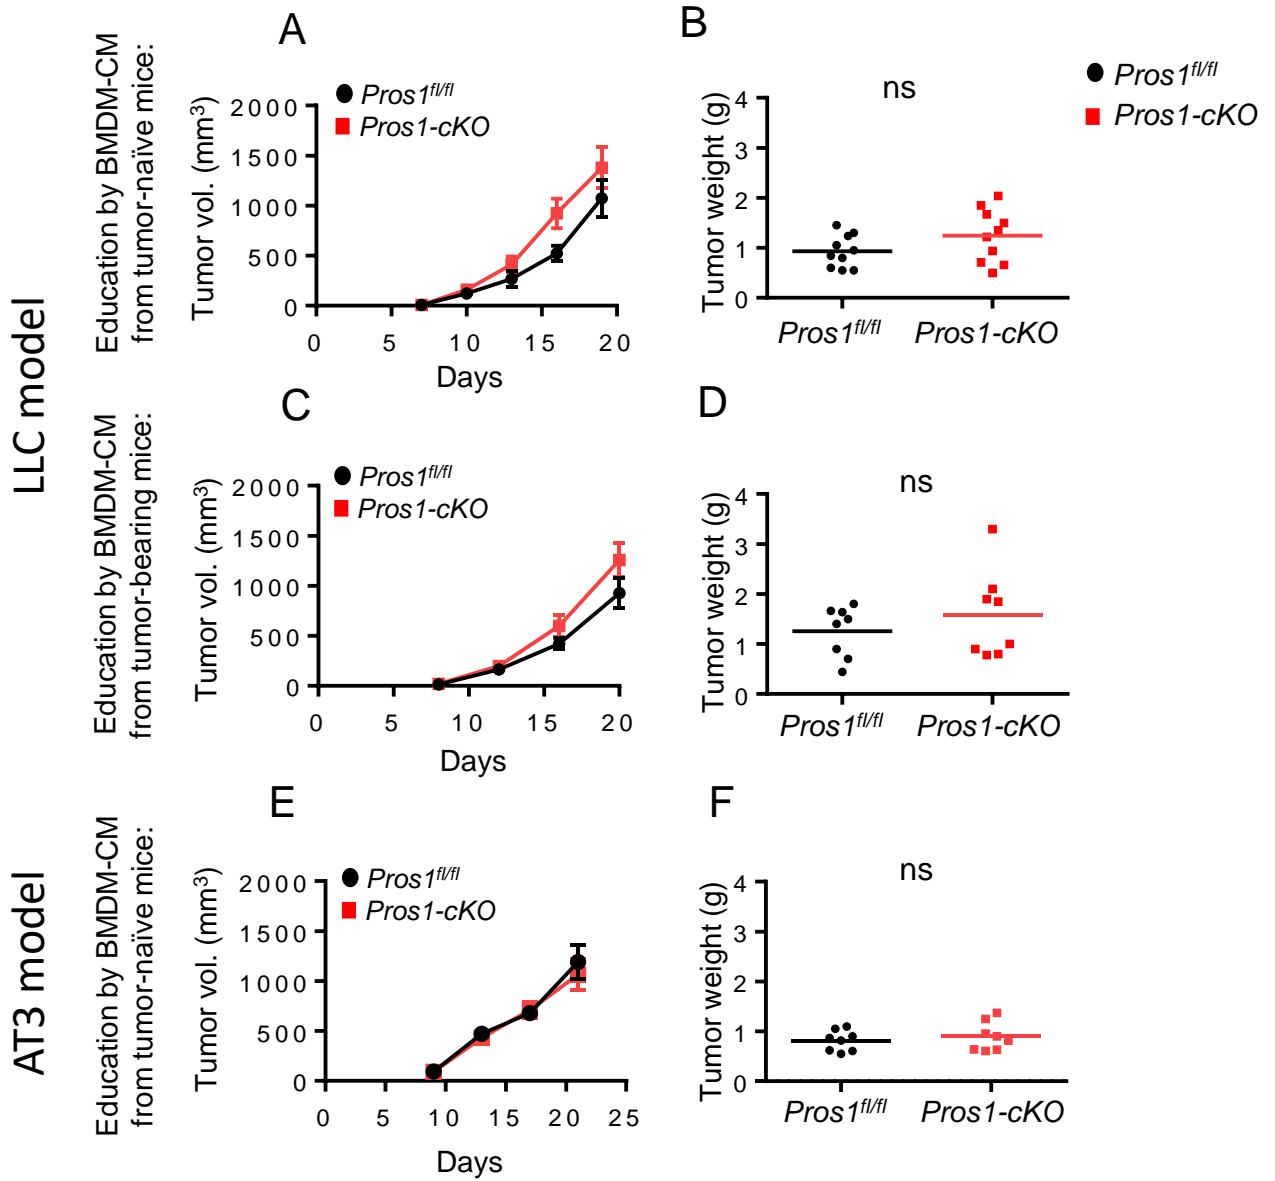

**Supl. Figure 5: Education of tumor cells by BMDM-CM from cKO mice does not affect primary tumor growth.**

(A-D) Growth parameters of LLC tumors generated by cells educated with BMDM-CM of cells derived from tumor-naïve (A, B) or tumor-bearing (C, D) control and *Pros1-cKO* mice. Average tumor volumes  $\pm$  SEM at the indicated time points are presented (A, C) and the end-stage tumor weight was recorded (B, D), with the mean tumor weight represented by a horizontal line. (n=10 for A, B and n = 8 for C, D; ns = not significant, t-test). (E-F) Primary tumor growth (E) and end-point tumor weight of AT3-GFP tumors educated by CM from tumor-naïve *Pros1-cKO* and control BMDMs. N=8 mice/group, ns = non-significant, t-test.

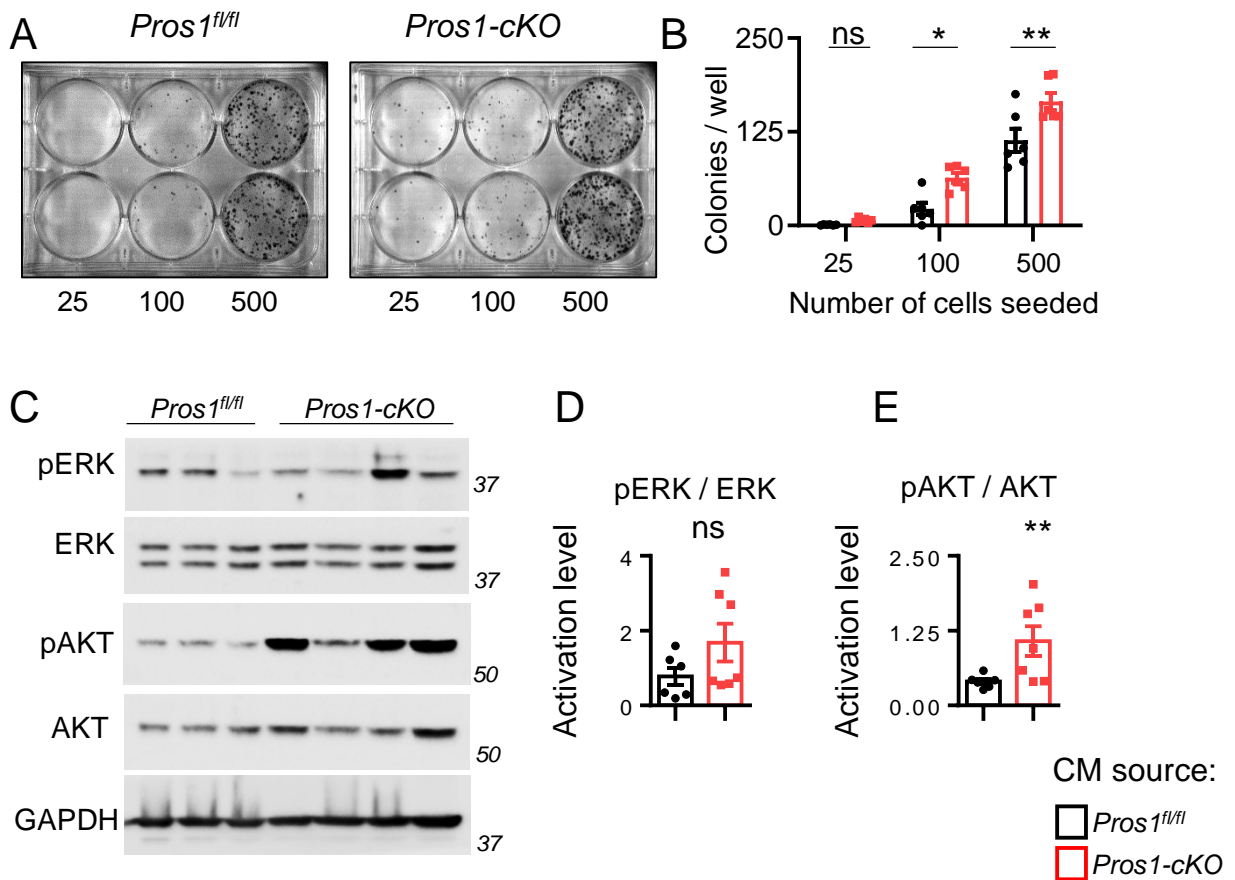

**Supl. Figure 6: Mouse mammary tumor cells acquire aggressiveness following education by *Pros1-cKO* BMDMs conditioned medium.**

AT3 cells were incubated (96 hr) with medium conditioned by control (*Pros1<sup>fl/fl</sup>*) or *Pros1-cKO* BMDMs, and subject to a survival assay (A, B). Cells were plated at various dilutions, with the total cells/well indicated. Representative images (A) and quantification (B) of surviving colonies after 10 days. Mean  $\pm$  SEM;  $n=6-7$  mice/group;  $P=0.02$ ,  $0.003$  for 100 and 500 cells/well respectively, ns= non-significant, by 2-way ANOVA. (C) A representative western blot and quantification (D, E) showing ERK and AKT phosphorylation in AT3 cells following education with BMDM-CM from control and *Pros1-cKO* mice.  $N=6-7$  mice/group; 2 independent experiments. The average ratio  $\pm$  SEM of pERK/ERK ( $P=0.053$ , ns=non-significant) and pAKT/AKT ( $P=0.01$ ) is plotted; t-test.

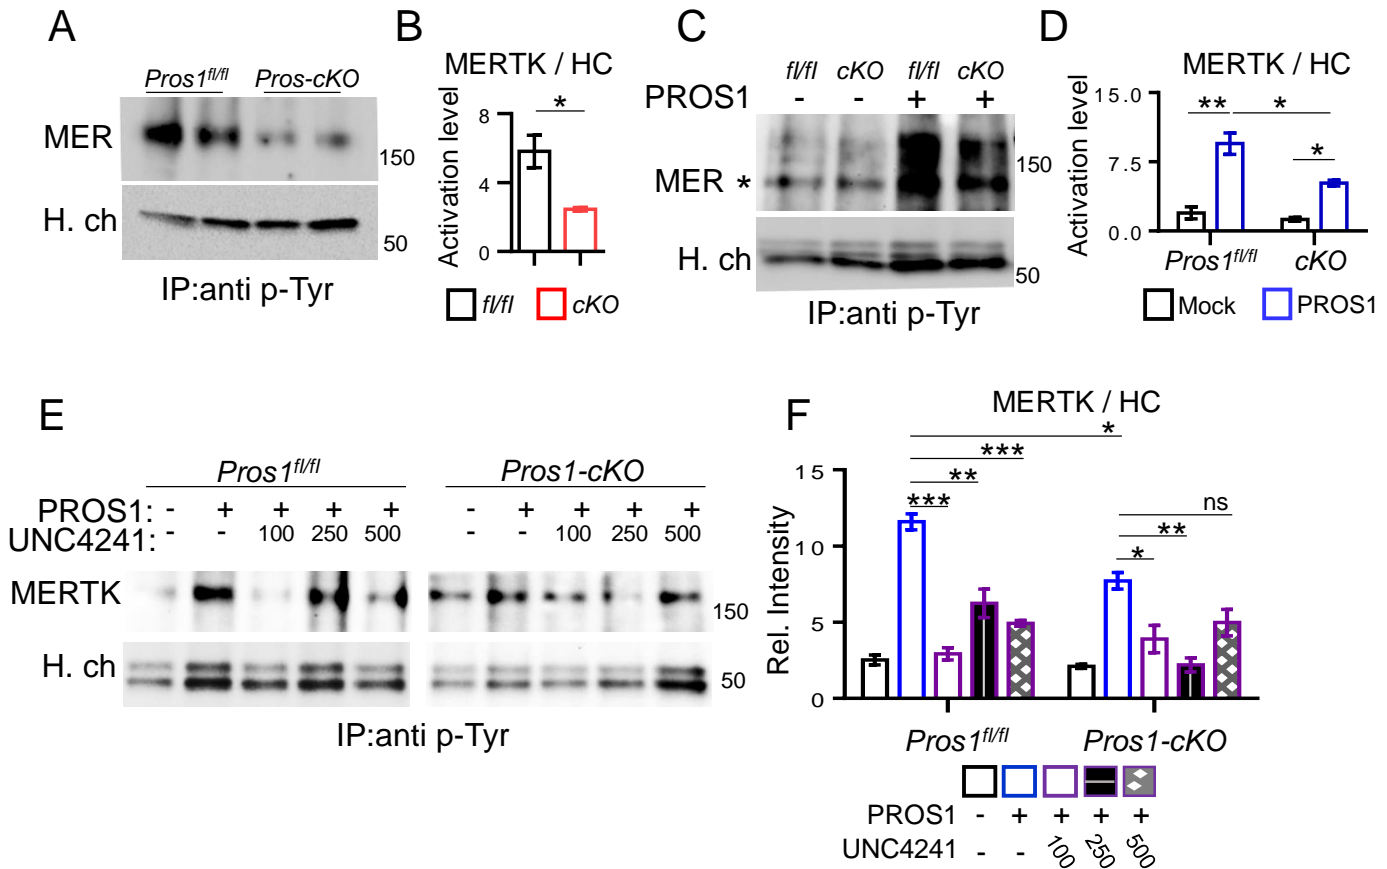

**Sup. Fig.7: Attenuated MERTK activation in *Pros1-cKO* BMDMs.**

(A-B) Attenuated MERTK activation levels in *Pros1-cKO* BMDMs. (A) pMERTK levels in BMDMs grown at steady state (10% FBS, unstimulated) assayed by immune precipitation (IP) with pan-pTyrosine (p-Tyr) antibody, followed by immunoblot analysis with anti MERTK, and quantification (B; n=5-6 mice/group; P=0.03; t-test). The IgG heavy chain (H. ch) served as an internal control. (C, D) pMERTK in serum-starved BMDMs with (+) or without (-) PROS1 stimulation (25 nM). (D) Quantified band intensities of IPs shown in (C), n=4-6/group; \*\*P=0.005, \*P≤0.05; 2-way ANOVA. Relative band intensities ± SEM; 3 independent experiments. The IgG heavy chain (H. ch) served as an internal control (E-F) Pharmacological inhibition of TAM receptors. IP analysis of pMERTK in the presence of the pan-TAM inhibitor UNC4241 (100-500 nM) in serum starved BMDMs, stimulated with (+) or without (-) PROS1 (25 nM). IP:p-Tyr, WB: anti MERTK. Representative blots (E) and quantification of band intensities (F) of pMERTK and the heavy chain. Relative band intensities ± SEM; n=3 pooled samples/lane; 2 independent experiments; \*\*\*P≤ 0.0003, \*\*P≤0.004, \*P=0.02, and ns = non-significant 2-way ANOVA.

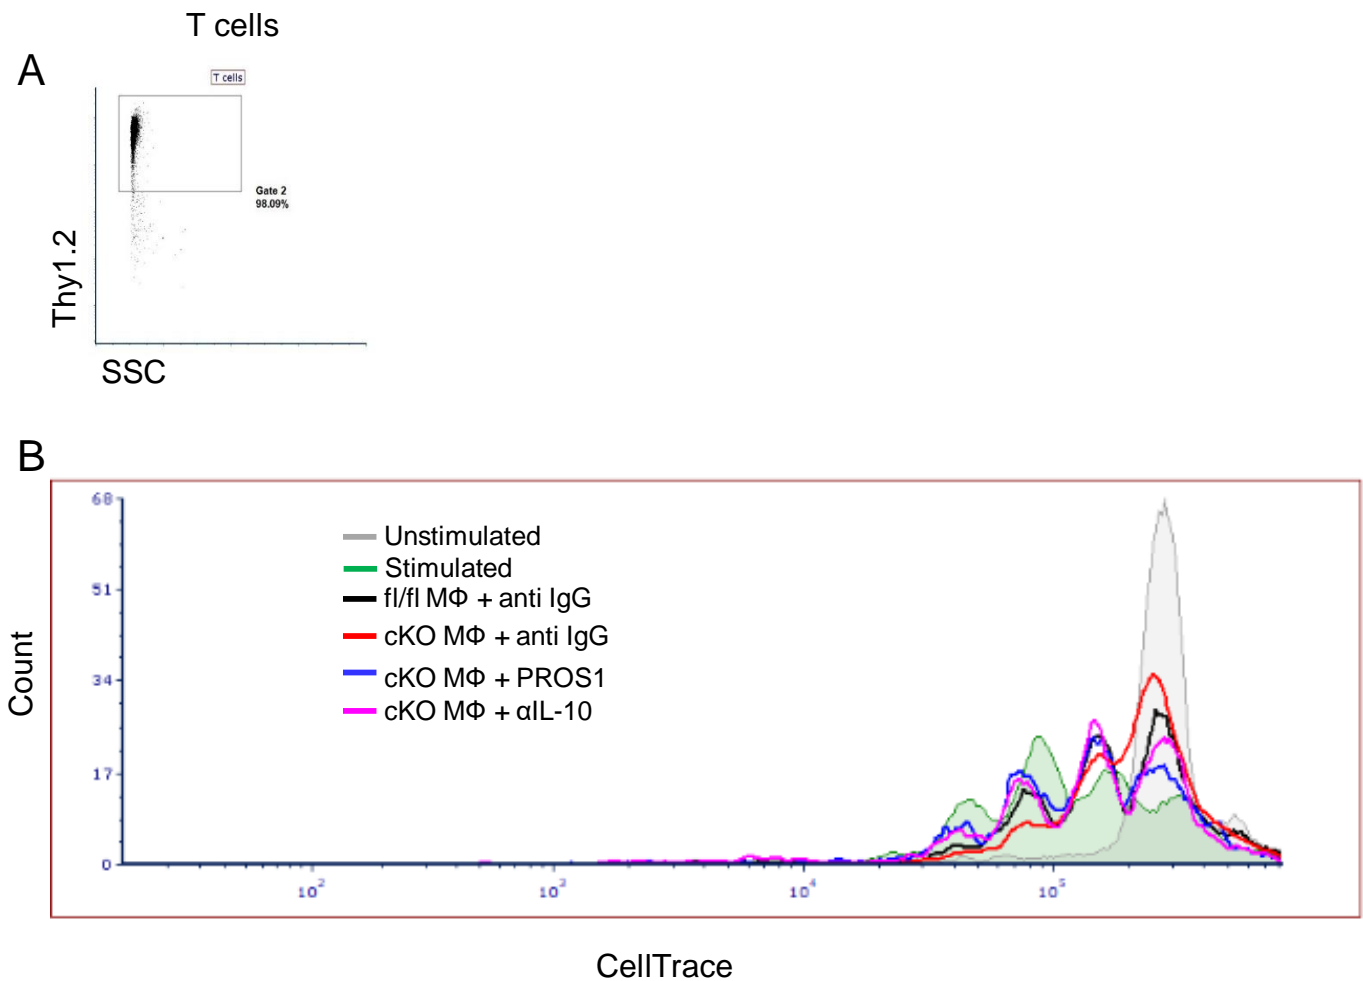

**Supl. Figure. 8: PROS1 supports T cell proliferation.**

(A) Purity of T cells isolated from the spleen, as determined by the Thy1.2 cell surface marker. (B) Representative histogram following 72 hrs of co-culture showing dilution of the intracellular marker CellTrace in unstimulated and stimulated T cells that were either left alone or incubated with the indicated macrophages (MΦ) and supplemented with control IgG (5μg/ml), αIL-10 (5μg/ml) or hPROS1 (50 nM).
